# Supplementary material for: The hibernating 100S complex is a target of ribosome-recycling factor and elongation factor G in Staphylococcus aureus
Source: PubMed Central journal article supplement (PMC7196661; doi:10.1074/jbc.ra119.012307), 2020-03-24
Supplement: supp_RA119.012307_157704_2_supp_495450_q7pyws.pdf [file supp_RA119.012307_157704_2_supp_495450_q7pyws.pdf]

## Supporting Information

The hibernating 100S complex is a target of ribosome recycling factor and elongation factor G in *Staphylococcus aureus*

**Arnab Basu<sup>1</sup>, Kathryn E. Shields<sup>1</sup>, and Mee-Ngan F. Yap<sup>1,2\*</sup>**

From the <sup>1</sup>Department of Biochemistry and Molecular Biology, Saint Louis University School of Medicine, Saint Louis, MO 63104; <sup>2</sup>Department of Microbiology-Immunology, Northwestern University Feinberg School of Medicine, Chicago, IL 60611.

Running title: *Recycling of S. aureus 100S ribosomes*

\*To whom correspondence should be addressed: Mee-Ngan F. Yap, Department of Microbiology-Immunology, Northwestern University Feinberg School of Medicine, Chicago, IL 60611; [frances.yap@northwestern.edu](mailto:frances.yap@northwestern.edu); Tel. (312) 503-3793

- 1) **Table S1.** Strains and Plasmids.
- 2) **Table S2.** Oligonucleotide primers.
- 3) **Figure S1.** EF-G (R59A), RRF(A28E) and RRF(V116D) mutations do not affect ribosome interactions.
- 4) **Figure S2.** Analysis of RRF mutant proteins.
- 5) **Figure S3.** Effects of solidifying agents on the growth of the RRF-depleted strain.
- 6) **Figure S4.** HflX is exclusively expressed during heat stress.
- 7) **Supporting Information References**

Table S1. Strains and plasmids.

| Name                                                   | Genotypes and relevant features                                                                                                                                                                                                                 | Source        |
|--------------------------------------------------------|-------------------------------------------------------------------------------------------------------------------------------------------------------------------------------------------------------------------------------------------------|---------------|
| <i>S. aureus</i>                                       |                                                                                                                                                                                                                                                 | BEI resources |
| JE2                                                    | Parental strain, plasmid cured LAC strain                                                                                                                                                                                                       | NR-46543      |
| RN4220                                                 | <i>sauI</i> <sup>-</sup> , <i>hsdR</i> <sup>-</sup> , <i>mec</i> <sup>-</sup> , <i>rsbU</i> <sup>-</sup> , <i>agr</i> <sup>-</sup>                                                                                                              | ATCC NR-45946 |
| RN9011                                                 | RN4220/pRN7023 (SaPII integrase), Cm <sup>R</sup>                                                                                                                                                                                               | (1)           |
| MNY102                                                 | $\Delta$ <i>hflX</i> ::Erm                                                                                                                                                                                                                      | (2)           |
| MNY147                                                 | <i>frr</i> <sup>+</sup> , P <sub>Tet</sub> - <i>frr</i> , CdCl <sub>2</sub> <sup>R</sup>                                                                                                                                                        | This work     |
| MNY162 <sup>a</sup>                                    | $\Delta$ <i>frr</i> ::Km, <i>frr</i> <sup>+</sup> , P <sub>Tet</sub> - <i>frr</i> ; CdCl <sub>2</sub> <sup>R</sup> , Km <sup>R</sup>                                                                                                            | This work     |
| MNY165 <sup>a</sup>                                    | $\Delta$ <i>frr</i> ::Km, <i>frr</i> <sup>+</sup> , P <sub>Tet</sub> - <i>frr</i> ; CdCl <sub>2</sub> <sup>R</sup> , Km <sup>R</sup>                                                                                                            | This work     |
| <i>E. coli</i>                                         |                                                                                                                                                                                                                                                 | Lucigen       |
| BL21(DE3)                                              | F <sup>-</sup> <i>ompT gal dcm lon hsdS<sub>B</sub>(r<sub>B</sub><sup>-</sup>m<sub>B</sub><sup>-</sup>)</i> $\lambda$ (DE3 [ <i>lacI lacUV5-T7p07 ind1 sam7 nin5</i> ]) [ <i>malB</i> <sup>+</sup> ] <sub>K-12</sub> ( $\lambda$ <sup>S</sup> ) |               |
| <b>Plasmids</b>                                        |                                                                                                                                                                                                                                                 |               |
| pRMC2                                                  | <i>E. coli-S. aureus</i> shuttle vector, Tet-inducible promoter, Amp <sup>R</sup> , Cm <sup>R</sup>                                                                                                                                             | (3)           |
| pLI50                                                  | <i>E. coli-S. aureus</i> shuttle vector, Amp <sup>R</sup> , Cm <sup>R</sup>                                                                                                                                                                     | (4)           |
| pBT2                                                   | Temperature sensitive, <i>E. coli-S. aureus</i> shuttle vector, Amp <sup>R</sup> , Cm <sup>R</sup>                                                                                                                                              | (5)           |
| pBTK                                                   | Temperature sensitive, <i>E. coli-S. aureus</i> shuttle vector, 1.4-kb <i>aph-A3</i> cloned into <i>SmaI</i> site of pBT2, Amp <sup>R</sup> , Cm <sup>R</sup> , Km <sup>R</sup>                                                                 | (6)           |
| pJC1111                                                | Suicide vector, Amp <sup>R</sup> , CdCl <sub>2</sub> <sup>R</sup>                                                                                                                                                                               | (1)           |
| <i>phflX</i>                                           | Native promoter driven- <i>hflX</i> on pLI50, Amp <sup>R</sup> , Cm <sup>R</sup>                                                                                                                                                                | (2)           |
| pDM4                                                   | <i>gfp</i> under control of a P <sub>cidABC</sub> promoter, Amp <sup>R</sup> , Cm <sup>R</sup>                                                                                                                                                  | (7)           |
| pDM4(K54stop)                                          | <i>gfp(K54stop)</i> under control of a P <sub>cidABC</sub> promoter, Amp <sup>R</sup> , Cm <sup>R</sup>                                                                                                                                         | This work     |
| <i>pfrr</i>                                            | <i>frr</i> on pLI50 under control of a <i>codY</i> -dependent promoter, Amp <sup>R</sup> , Cm <sup>R</sup>                                                                                                                                      | This work     |
| <i>pfrr</i> (V116D)                                    | <i>frr</i> (V116D) on pLI50 under control of a <i>codY</i> -dependent promoter, Amp <sup>R</sup> , Cm <sup>R</sup>                                                                                                                              | This work     |
| pJC1111-P <sub>Tet</sub> His <sub>6</sub> - <i>frr</i> | P <sub>Tet</sub> His <sub>6</sub> - <i>frr</i> on pJC111, Amp <sup>R</sup> , CdCl <sub>2</sub> <sup>R</sup>                                                                                                                                     | This work     |
| pBT2 $\Delta$ <i>frr</i> ::Km                          | $\Delta$ <i>frr</i> ::Km allele on pBT2, ts, Amp <sup>R</sup> , Cm <sup>R</sup>                                                                                                                                                                 | This work     |
| pET28a                                                 | Overexpression plasmid, Km <sup>R</sup>                                                                                                                                                                                                         | Novagen       |
| pET28_HflX                                             | <i>hflX</i> on pET28a, Km <sup>R</sup> ; N-terminally 6His-tagged HflX                                                                                                                                                                          | (2)           |
| pET28_RFF                                              | <i>frr</i> on pET28a, Km <sup>R</sup> ; N-terminally 6His-tagged RRF                                                                                                                                                                            | This work     |
| pET28_RFF (A28E)                                       | <i>frr</i> (A28E) on pET28a, Km <sup>R</sup> ; N-terminally 6His-tagged RRF(A28E)                                                                                                                                                               | This work     |
| pET28_RFF (V116D)                                      | <i>frr</i> (V116D) on pET28a, Km <sup>R</sup> ; N-terminally 6His-tagged RRF(V116D)                                                                                                                                                             | This work     |
| pET28_EF-G                                             | <i>fusA</i> on pET28a, Km <sup>R</sup> ; C-terminally 8His-tagged EF-G                                                                                                                                                                          | This work     |
| pET28_EF-G (R29A)                                      | <i>fusA</i> (R29A) on pET28a, Km <sup>R</sup> ; C-terminally 8His-tagged EF-G (R29A)                                                                                                                                                            | This work     |
| pET28_EF-G (R59A)                                      | <i>fusA</i> (R59A) on pET28a, Km <sup>R</sup> ; C-terminally 8His-tagged EF-G (R59A)                                                                                                                                                            | This work     |
| pET28_EF-G (H572K)                                     | <i>fusA</i> (H572K) on pET28a, Km <sup>R</sup> ; C-terminally 8His-tagged EF-G (H572K)                                                                                                                                                          | This work     |

<sup>a</sup> independent clones of RRF-depleted strains.



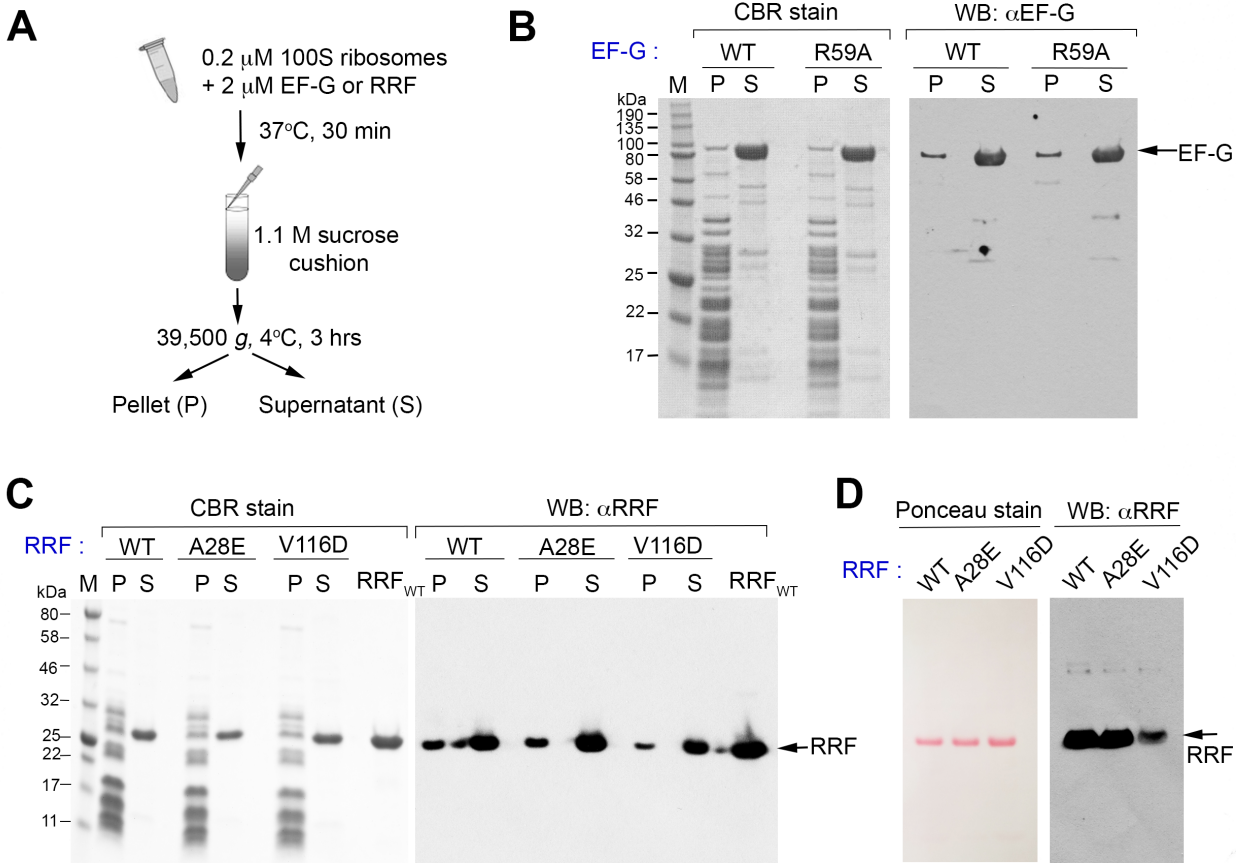

**Figure S1. EF-G (R59A), RRF(A28E) and RRF(V116D) mutations do not affect ribosome interactions.** (A) Experimental scheme of the ribosome-binding assay. RRF-bound or EF-G-bound ribosomes are co-sedimented in the pellet (P) fraction after ultracentrifugation. Free forms of RRF and EF-G are present in the supernatant (S). (B) EF-G(R59A) binds to the ribosome in a comparable manner to WT EF-G. Immunoblotting of co-sedimented fractions against an anti-EF-G antibody (1:4,000 dilutions). (C) The ribosome binding of RRF mutants is comparable to the WT RRF. As in panel (B), Western blotting (1:4,000 dilutions of anti-RRF) was used to assess the amount of ribosome-bound RRF. The weaker signals of the V116D mutant are not due to impaired ribosome binding but to the poor reactivity of the V116D mutant protein to the antibody (see panel D). Recombinantly purified RRF(RRF<sub>WT</sub>) serves as the marker. M, protein marker. (D) Anti-RRF does not recognize the V116D mutant as efficiently as the WT or its A28E mutant in a Western blot. Equal amounts of purified recombinant RRF proteins were loaded onto SDS-PAGE gels and probed with anti-RRF (1:4,000 dilutions).

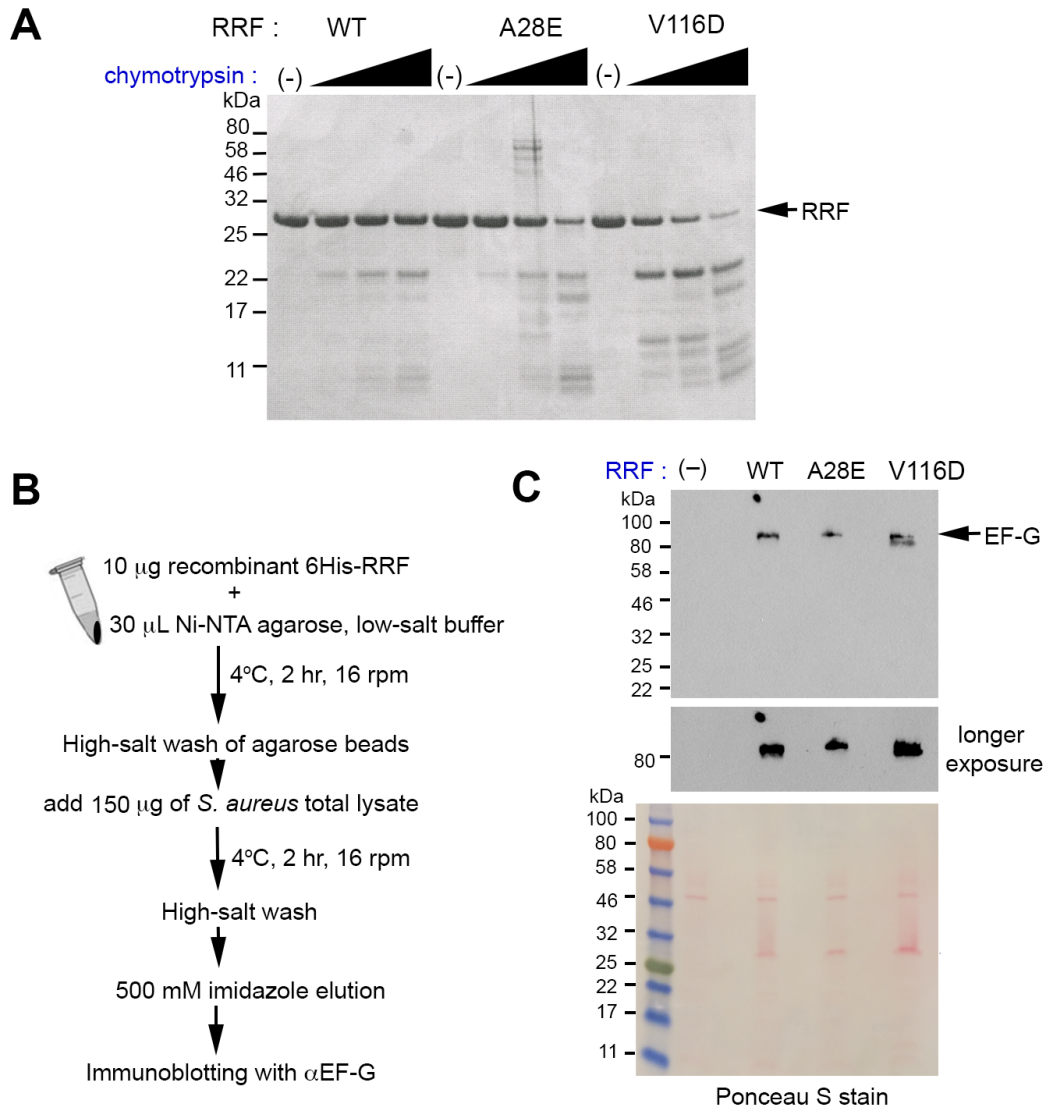

**Figure S2. Analysis of RRF mutant proteins.** (A) Limited proteolysis with chymotrypsin revealed significant conformational changes in the RRF(V116D) mutant protein. RRFs at 2  $\mu$ M were incubated with immobilized chymotrypsin (Princeton Separations) at increasing concentrations (0, 0.002 mU, 0.01 mU, 0.2 mU). The reactions were performed at 37°C for 20 min and stopped by the addition of 1 mM phenylmethylsulfonyl fluoride (PMSF). The samples were precipitated with acetone and analyzed in a 4-12% Bis-Tris/MES SDS-PAGE gel. The V116D mutant shows much greater proteolytic susceptibility compared to the WT and the A28E mutant. (B) Experimental procedures of the affinity pull-down assay presented in panel C. (C) The RRF mutants capture cellular EF-G as effectively as the WT RRF. The recombinant His<sub>6</sub>-tag proteins of the RRF mutants were used as the bait to pull down EF-G from the total cell lysates, followed by detection via Western blotting using anti-EF-G (1:4,000 dilutions).

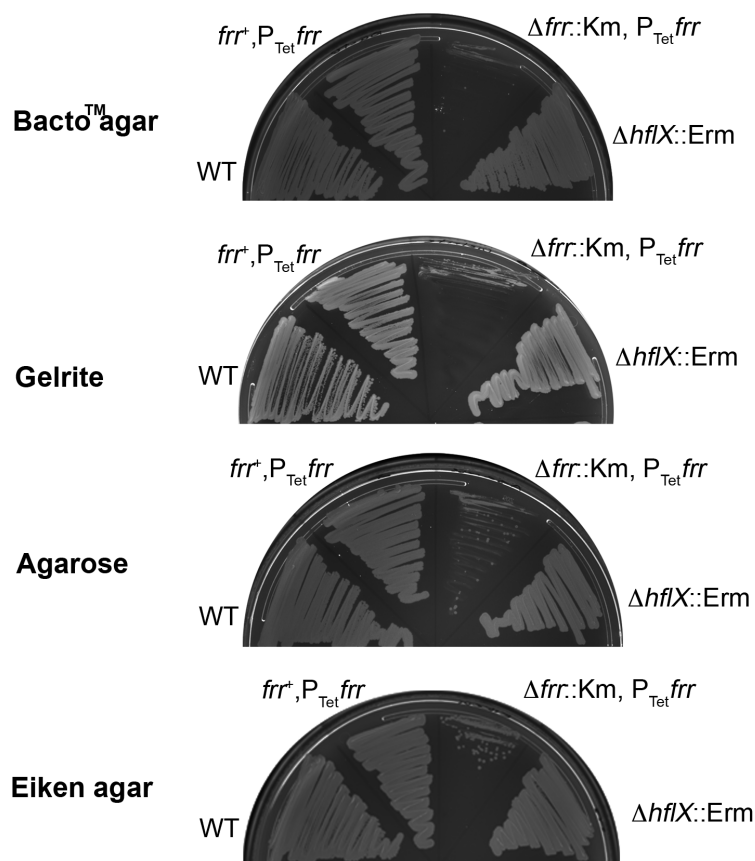

**Figure S3. Effects of solidifying agents on the growth of the RRF-depleted strain.** Agarose with a lower ash content and Eiken agar holding more moisture support better growth of the RRF-depleted strain ( $\Delta frr::Km, P_{Tet} frr$ ) in the absence of the anhydrotetracycline (aTc) inducer. Tryptic soy broth (TSB)-based agar plates were prepared with conventional Bacto™ agar (same as in Figs. 4-5), the phenolic compound-free Gelrite, agarose or Eiken agar without aTc supplementation.

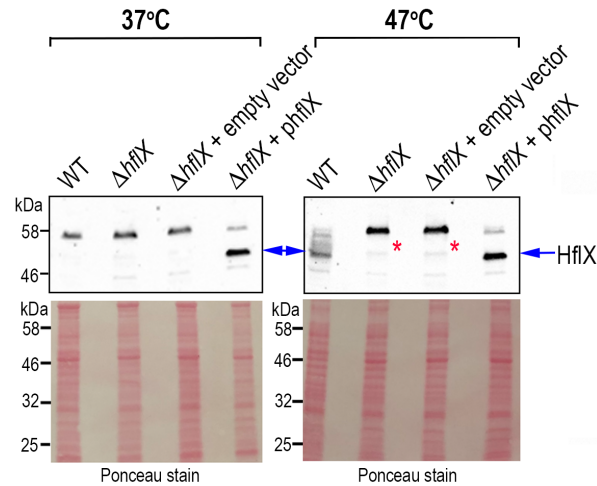

**Figure S4. HflX is exclusively expressed during heat stress.** Lysates were extracted from logarithmically growing *S. aureus* tryptic soy broth (TSB) cultures at 37°C, or TSB cultures after 2 hr of heat shock at 47°C. Total protein (125 μg/lane) was resolved by SDS-PAGE and probed with anti-HflX (1:1,000 dilutions) that were preabsorbed with lysates from the Δ*hflX* knockout to reduce non-specific cross-reaction. The plasmid-borne *hflX* overexpressing strain served as a positive control. HflX was undetectable at 37°C. Blue arrows indicate HflX bands. A red asterisk marks the nonspecific band migrates slightly slower than HflX.

### Supporting information references

1. Chen, J., Yoong, P., Ram, G., Torres, V. J., and Novick, R. P. (2014) Single-copy vectors for integration at the SaPII attachment site for *Staphylococcus aureus*. *Plasmid* **76**, 1-7
2. Basu, A., and Yap, M. N. (2017) Disassembly of the *Staphylococcus aureus* hibernating 100S ribosome by an evolutionarily conserved GTPase. *Proc Natl Acad Sci U S A* **114**, E8165-E8173. PMID: PMC5625922
3. Corrigan, R. M., and Foster, T. J. (2009) An improved tetracycline-inducible expression vector for *Staphylococcus aureus*. *Plasmid* **61**, 126-129
4. Lee, C. Y., Buranen, S. L., and Ye, Z. H. (1991) Construction of single-copy integration vectors for *Staphylococcus aureus*. *Gene* **103**, 101-105
5. Bruckner, R. (1992) A series of shuttle vectors for *Bacillus subtilis* and *Escherichia coli*. *Gene* **122**, 187-192
6. Fuller, J. R., Vitko, N. P., Perkowski, E. F., Scott, E., Khatri, D., Spontak, J. S., Thurlow, L. R., and Richardson, A. R. (2011) Identification of a lactate-quinone oxidoreductase in *Staphylococcus aureus* that is essential for virulence. *Front Cell Infect Microbiol* **1**, 19
7. Moormeier, D. E., Endres, J. L., Mann, E. E., Sadykov, M. R., Horswill, A. R., Rice, K. C., Fey, P. D., and Bayles, K. W. (2013) Use of microfluidic technology to analyze gene expression during *Staphylococcus aureus* biofilm formation reveals distinct physiological niches. *Appl Environ Microbiol* **79**, 3413-3424
